CORRECTION

## Correction: Detection, transport, and retention of *Toxoplasma gondii* oocysts in saturated sandy porous media: Influence of electrolytes and natural organic matter in flow-through systems

Christian P. Pullano, Mahsa Ghorbani, Timothy J. Mutty, Sohib Gouasmia, Coralie L'Ollivier, Jitender P. Dubey, Aurélien Dumètre, Christophe J. G. Darnault

There is an error in the caption within [Fig 6](#). Please see the correct [Fig 6](#) here.

### Reference

1. Pullano CP, Ghorbani M, Mutty TJ, Gouasmia S, L'Ollivier C, Dubey JP, et al. Detection, transport, and retention of *Toxoplasma gondii* oocysts in saturated sandy porous media: Influence of electrolytes and natural organic matter in flow-through systems. PLoS One. 2025;20(10):e0331812. <https://doi.org/10.1371/journal.pone.0331812> PMID: [41056295](https://pubmed.ncbi.nlm.nih.gov/41056295/)

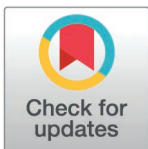

### OPEN ACCESS

**Citation:** Pullano CP, Ghorbani M, Mutty TJ, Gouasmia S, L'Ollivier C, Dubey JP, et al. (2026) Correction: Detection, transport, and retention of *Toxoplasma gondii* oocysts in saturated sandy porous media: Influence of electrolytes and natural organic matter in flow-through systems. PLoS One 21(4): e0347130. <https://doi.org/10.1371/journal.pone.0347130>

**Published:** April 13, 2026

**Copyright:** © 2026 Pullano et al. This is an open access article distributed under the terms of the [Creative Commons Attribution License](https://creativecommons.org/licenses/by/4.0/), which permits unrestricted use, distribution, and reproduction in any medium, provided the original author and source are credited.

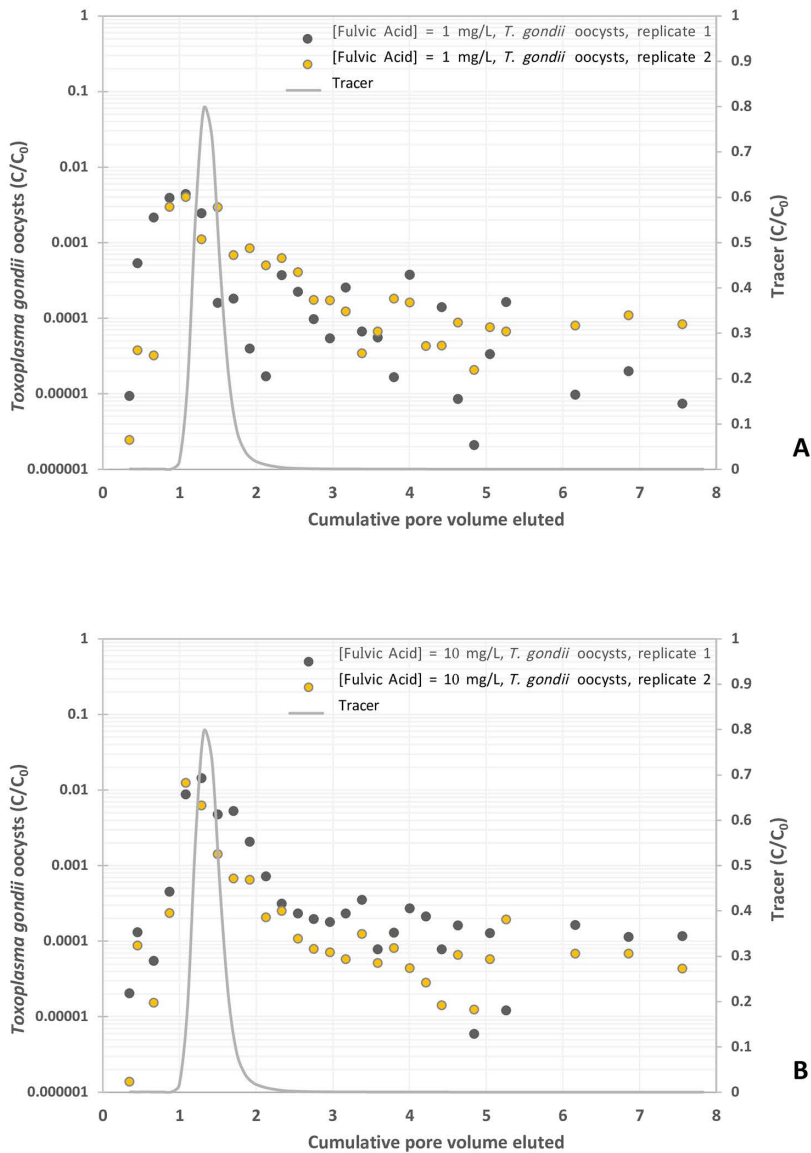

**Fig 6. Experimental BTCs of *Toxoplasma gondii* oocysts in suspension of fulvic acid at different concentrations, y-axis represents the normalized effluent concentration  $C/C_0$  and x-axis represents dimensionless time expressed as pore volumes, which are equivalent to the volume of fluid injected divided by the total pore volume of the column. (A) Fulvic acid = 1. mg/L, and (B) Fulvic acid = 10 mg/L.**

<https://doi.org/10.1371/journal.pone.0347130.g006>
